# Supplementary material for: Structural determinants of 5′,6′-epoxyeicosatrienoic acid binding to and activation of TRPV4 channel
Source: PubMed Central journal article supplement (PMC5585255; doi:10.1038/s41598-017-11274-1), 2017-09-05
Supplement: 41598_2017_11274_MOESM1_ESM.pdf [file 41598_2017_11274_MOESM1_ESM.pdf]

## **Structural determinants of 5',6'-epoxyeicosatrienoic acid binding to and activation of TRPV4 channel**

Alejandro Berna-Erro<sup>a,1</sup>, Mercè Izquierdo-Serra<sup>a,1</sup>, Romina V. Sepúlveda<sup>b</sup>, Fanny Rubio-Moscardo<sup>a</sup>, Pau Doñate-Macián<sup>a</sup>, Selma A. Serra<sup>a</sup>, Julia Carrillo-García<sup>a</sup>, Alex Perálvarez-Marín<sup>c</sup>, Fernando González-Nilo<sup>b,d</sup>, José M. Fernández-Fernández<sup>a,2</sup> and Miguel A. Valverde<sup>a,2</sup>

<sup>a</sup>Laboratory of Molecular Physiology, Dept. of Experimental and Health Sciences, Universitat Pompeu Fabra, Barcelona, Spain.

<sup>b</sup>Universidad Andrés Bello, Center for Bioinformatics and Integrative Biology, Facultad de Ciencias Biológicas, Av. República 239, Santiago, Chile.

<sup>c</sup>Unitat de Biofísica, Centre d'Estudis en Biofísica, Departament de Bioquímica i de Biologia Molecular, Universitat Autònoma de Barcelona, 08193 Bellaterra, Spain

<sup>d</sup>Centro Interdisciplinario de Neurociencia de Valparaíso, Facultad de Ciencias, Universidad de Valparaíso, Valparaíso 2366103, Chile.

<sup>1</sup>Contributed equally to this work

<sup>2</sup>Corresponding authors: Prof. Miguel A. Valverde and Dr. José M. Fernández-Fernández  
Laboratory of Molecular Physiology, Universitat Pompeu Fabra, C/ Dr. Aiguader 88, Barcelona 08003, Spain. Phone: 34 93 3160853, Fax: 34 93 3160901. Email: [miguel.valverde@upf.edu](mailto:miguel.valverde@upf.edu) ; [jmanuel.fernandez@upf.edu](mailto:jmanuel.fernandez@upf.edu)

## SUPPLEMENTARY INFORMATION

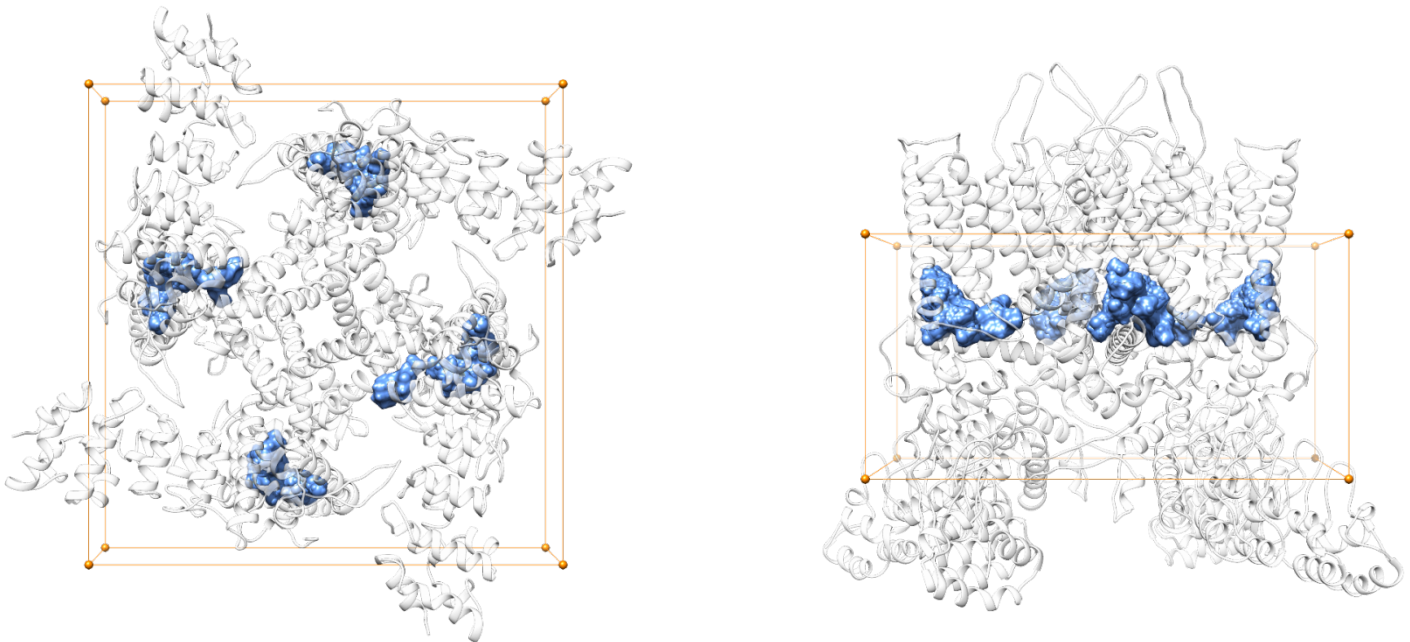

```

148 VFNRPILFDIVSRGSTADLDGLLPFL LTHKKRLTDEEFREPSTGKTC LPKALLNLSNGRN 207
208 DTIPVLLDIAERTGNMREFI NSPFRDIYYRGQTALHIAIERCKHYVELLVAQGADVHAQ 267
268 ARGRFFQPKDEGGYFYFGE LPLSLAAC TNQPHIVNYLTENPHKKADMRRQDSRGNTVLHA 327
328 LVAIADNTRENTKFVTKMYD LLLKCARLFPDSNLEAVLNNDGLSPLMMAAKTGKIGIFQ 387
388 HIIRREVTDEDTRHLSRKF KDWAYGPVYSSLYDSSLDTCGEEASVLEILVYNSKIENRH 447
448 EMLAVEPINELLRDKWRKFGAVSFYINVVSYLCAMVIFTLTAYYQPLEGTPPYRRTTVD 507
508 YLRLAGEVITLFTGVLFFFTNIKDLFMKKCPGVNSLFI DGSFQLLYFIYSVLVIVSAALY 567
568 LAGIEAYLAVMVFALVLGWMNALYFTRGLKLTGTYSIMIQKILFKDLFRFLLVYLLFMIG 627
628 YASALVSLLNPCANMKVCNEDQTNCTVPTYPSCRDSETFSTFLLDLFKLTI GMGDLEMLS 687
688 STKYPVVFII LLVTYIILTFVLLNMLIALMGETVGQVSKESHWKLQWATTI LDIER 747
748 FPFVLRKA 755

```

**Figure supplement 1. 5',6'-EET blind docking. Top,** TRPV4 bottom and side views (white ribbons) with 100 5',6'-EET docking poses (light blue surface) defining the putative binding site. The docking box of 100Å x 100 Å x 50 Å is indicated by the orange line box. **Bottom,** TRPV4 residues (green highlight) within a 5 Å distance of the 5,6-EET docking poses.



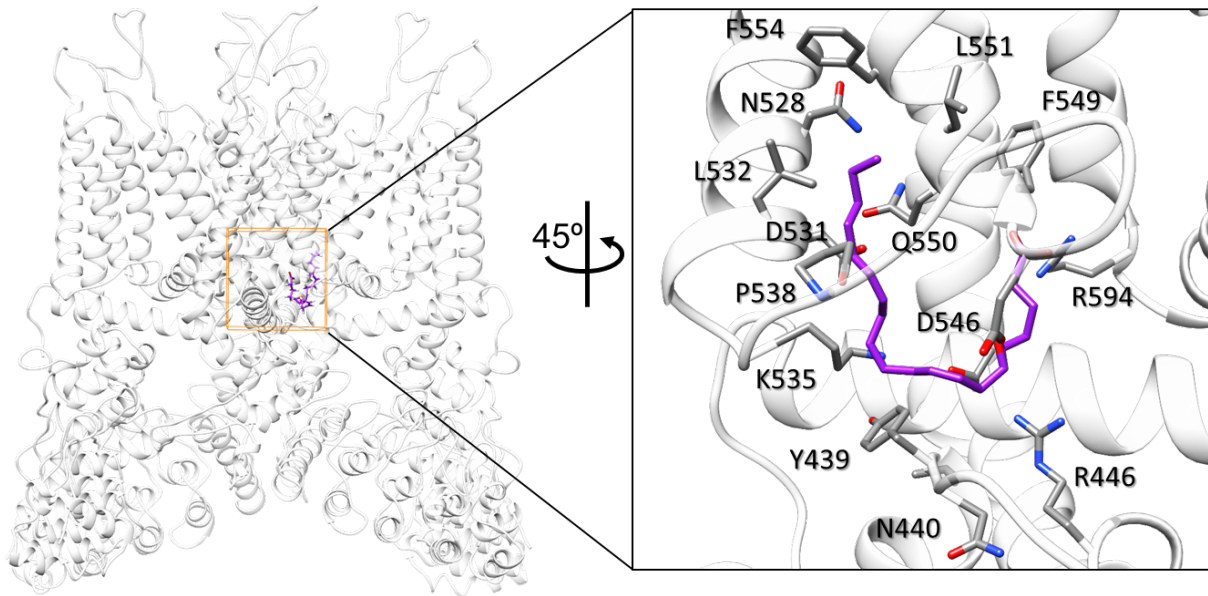

**Figure supplement 2. 5',6'-EET refined docking.** TRPV4 side view (white ribbons) with the 5',6'-EET highest energy docking solution (in purple) defining the putative binding site. The docking box of 20Å x 20 Å x 20 Å is indicated by the orange line box. The zoomed 5',6'-EET-binding site highlights the TRPV4 residues within a 3.5 Å distance of 5',6'-EET.

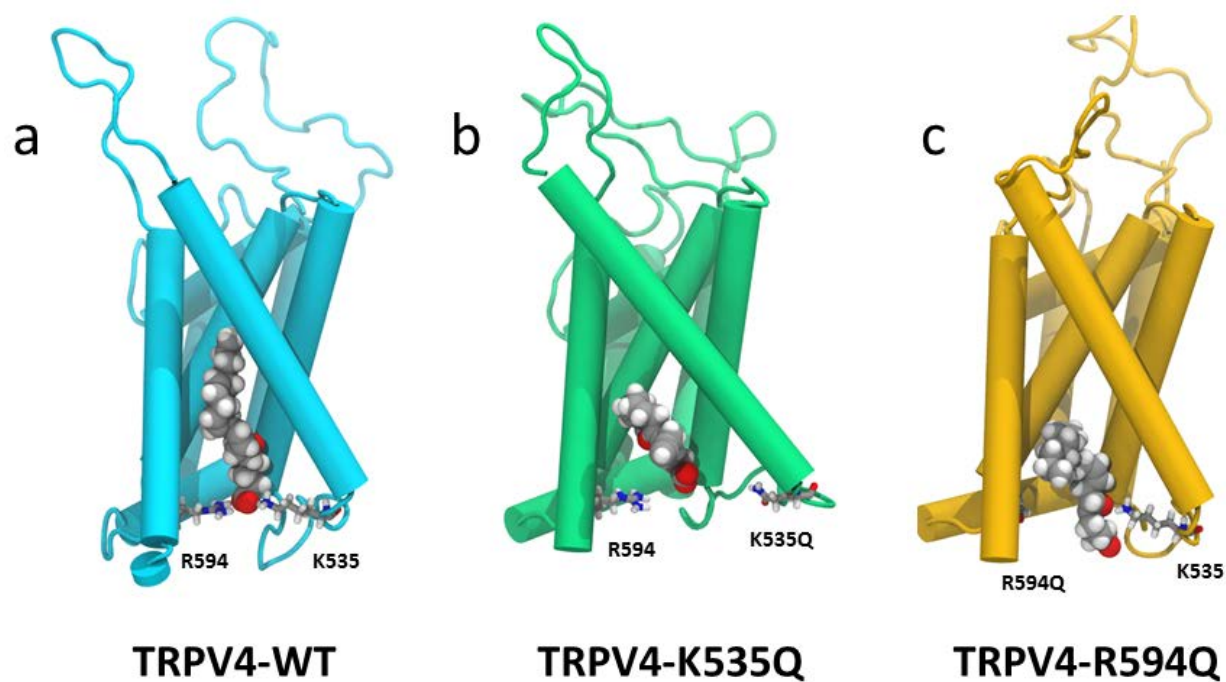

**Figure supplement 3.** Atomic-level interactions between 5',6'-EET and residues K535 and R594 of a single subunit in the TRPV4-WT (a), TRPV4-K535Q (b) and TRPV4-R594Q (c) systems. Note the increased distance between 5',6'-EET and the mutated residues K535Q and R594Q.

### S2-S3 linker

|           |              |     |                       |     |
|-----------|--------------|-----|-----------------------|-----|
| Human     | (Q9HBA0)     | 530 | KDLFMKKCPGVNSLFIDGSFQ | 550 |
| Bovine    | (E1BCP0)     | 530 | KDLFMKKCPGVNSLFIDGSFQ | 550 |
| Mouse     | (Q9EPK8)     | 530 | KDLFTKKCPGVNSLFVDGSFQ | 550 |
| Rat       | (Q9ERZ8)     | 530 | KDLFMKKCPGVNSLFVDGSFQ | 550 |
| Chicken   | (Q9DFS3)     | 516 | KDLFMKKCPGVNSFFIDGSFQ | 536 |
| Alligator | (A0A0H5APX6) | 521 | KDLFMKKCPGVNSFFIDGSFQ | 541 |
| Zebrafish | (Q0PEH1)     | 522 | KDLFLKKCPGVNSIFVDGSFQ | 542 |

\*\*\*\* \*\*\*\*\*:\*:\*\*\*\*\*

### S3

|           |              |     |                       |     |
|-----------|--------------|-----|-----------------------|-----|
| Human     | (Q9HBA0)     | 551 | LLYFIYSVLVIVSAALYLAGI | 571 |
| Bovine    | (E1BCP0)     | 551 | LLYFIYSVLVIVSAALYLAGI | 571 |
| Mouse     | (Q9EPK8)     | 551 | LLYFIYSVLVVVSAALYLAGI | 571 |
| Rat       | (Q9ERZ8)     | 551 | LLYFIYSVLVVVSAALYLAGI | 571 |
| Chicken   | (Q9DFS3)     | 537 | LLYFIYSVLVIVTAGLYLGGV | 557 |
| Alligator | (A0A0H5APX6) | 542 | LLYFIYSVLVIVTAGLYVAGI | 562 |
| Zebrafish | (Q0PEH1)     | 543 | LLYFIYSVLVVGSAALYLSGI | 563 |

\*\*\*\*\*: :\*.\*\*:.\*:

### S4

|           |              |     |                        |     |
|-----------|--------------|-----|------------------------|-----|
| Human     | (Q9HBA0)     | 573 | AYLAVMVFALVLGWMNALLYFT | 593 |
| Bovine    | (E1BCP0)     | 573 | AYLAVMVFALVLGWMNALLYFT | 593 |
| Mouse     | (Q9EPK8)     | 573 | AYLAVMVFALVLGWMNALLYFT | 593 |
| Rat       | (Q9ERZ8)     | 573 | AYLAVMVFALVLGWMNALLYFT | 593 |
| Chicken   | (Q9DFS3)     | 559 | AYLAVMVFALVLGWMNALLYFT | 579 |
| Alligator | (A0A0H5APX6) | 564 | AYLAVMVFALVLGWMNALLYFT | 584 |
| Zebrafish | (Q0PEH1)     | 565 | AYVSMVFALTLLGGMNPLYFT  | 585 |

\*\*::\*\*\*\*\*.\* \*\* \*\* \*\*\*\*

### S4-S5 linker

|           |              |     |                         |     |
|-----------|--------------|-----|-------------------------|-----|
| Human     | (Q9HBA0)     | 594 | RGLKLTGTYSIMIQKILFKDLFR | 616 |
| Bovine    | (E1BCP0)     | 594 | RGLKLTGTYSIMIQKILFKDLFR | 616 |
| Mouse     | (Q9EPK8)     | 594 | RGLKLTGTYSIMIQKILFKDLFR | 616 |
| Rat       | (Q9ERZ8)     | 594 | RGLKLTGTYSIMIQKILFKDLFR | 616 |
| Chicken   | (Q9DFS3)     | 580 | RGLKLTGTYSIMIQKILFKDLFR | 602 |
| Alligator | (A0A0H5APX6) | 585 | RGLKLTGTYSIMIQKILFKDLFR | 607 |
| Zebrafish | (Q0PEH1)     | 586 | RGLKLTGTYSIMIQKILIKDLFR | 608 |

\*\*\*\*\*:\*\*\*\*\*

**Figure supplement 4. Evolutionary conservation of TRPV4 regions relevant to EET binding.** Sequence alignment of S2-S3 linker, S3, S4 and S4-S5 linker of TRPV4 from different species. Residues within a distance of 3.5 Å of EET (according to MD simulation) are shown in purple. Closed arrows indicate identical aa and open arrows conserved or semi-conserved aa. “\*” identical residues; “:” conserved substitutions (same amino acid group); “.” semi-conserved substitution (similar shapes).

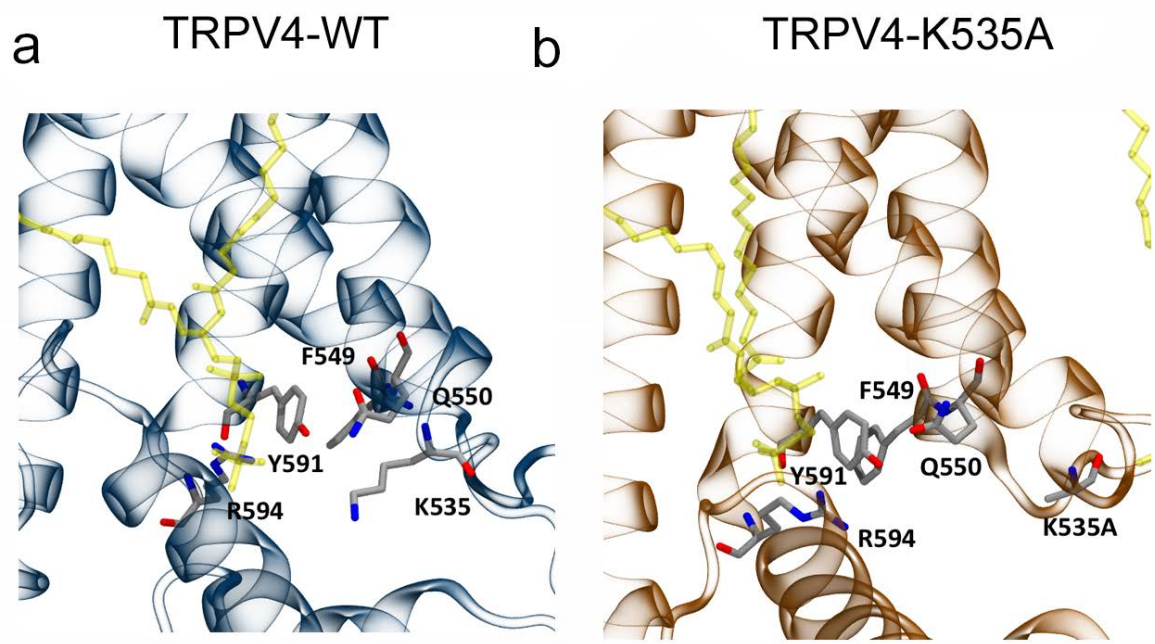

**Supplementary Figure. 5. MD simulations in the absence of 5',6'-EET.** Images of the predicted EET-binding site in TRPV4-WT (a) and TRPV4 K535A (b) in the absence of 5',6'-EET. In yellow are the membrane lipids (POPC) present in the simulation. Note that the predicted EET binding site is empty in both systems.

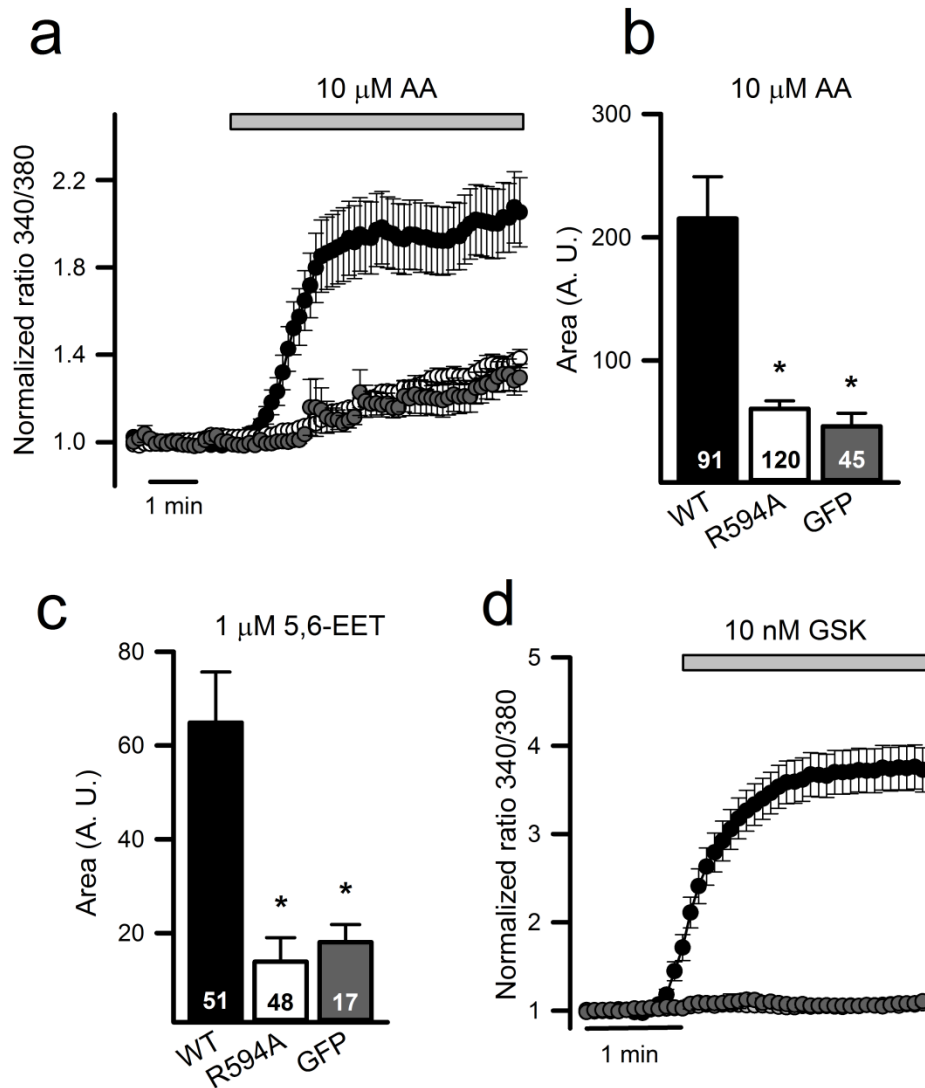

**Figure supplement 6. TRPV4-R594A lacks activation by 5',6'-EET, AA and GSK1016790A.** Changes in intracellular  $[Ca^{2+}]$  (indicated by normalized fura-2 ratios and areas under the curves) in HeLa cells transfected with GFP, TRPV4-WT or TRPV4-R594A cDNAs, after perfusion with 10  $\mu$ M AA (**a,b**), 1  $\mu$ M 5,6-EET (**c**) and 10 nM GSK1016790A (**d**). Numbers inside the bars indicate the number of cells analyzed. Means  $\pm$  S.E.M. \* $P < 0.05$  when compared with cells expressing TRPV4-WT channels (Kruskal-Wallis One Way Analysis of Variance followed by Dunn's method of multiple comparisons).



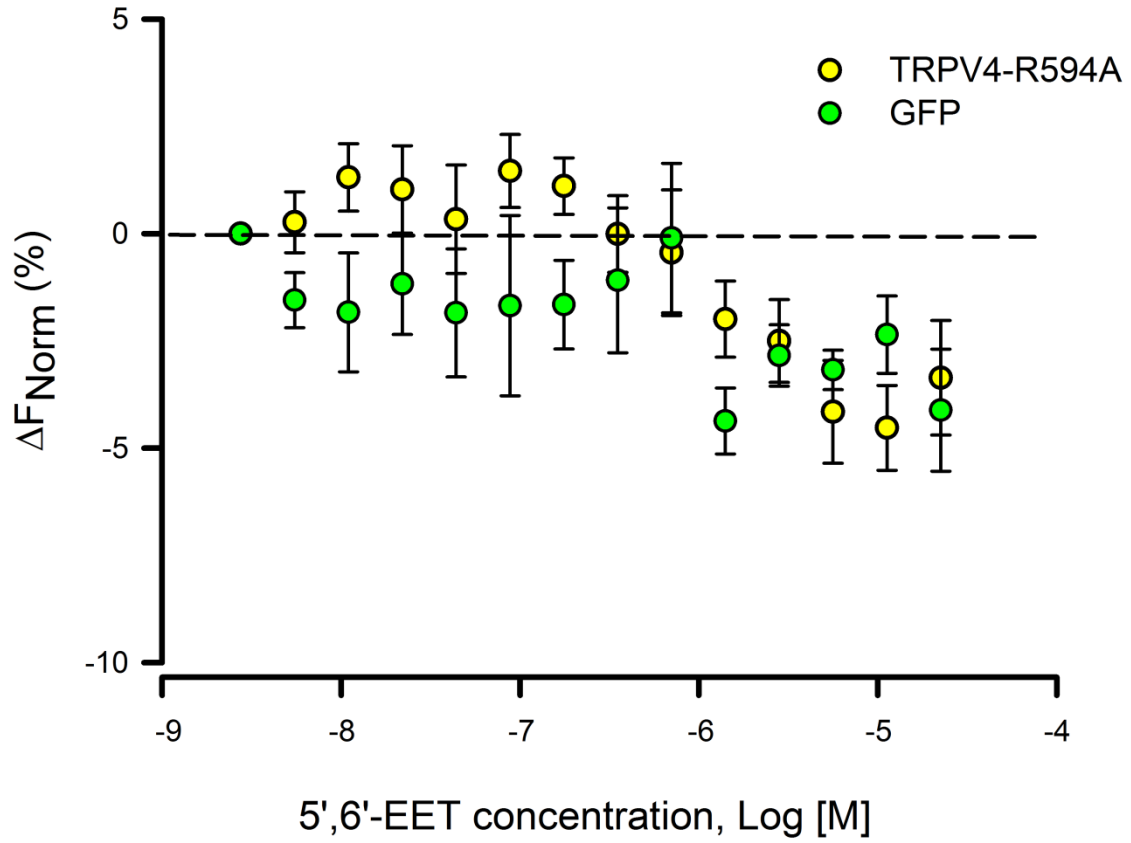

**Figure Supplement 7. Thermophoretic analysis of the TRPV4-EET interaction.**  
Average changes in normalized fluorescence obtained for GFP-labeled TRPV4-R594A (n=5) or GFP (n=5) plotted against 5',6'-EET concentration.

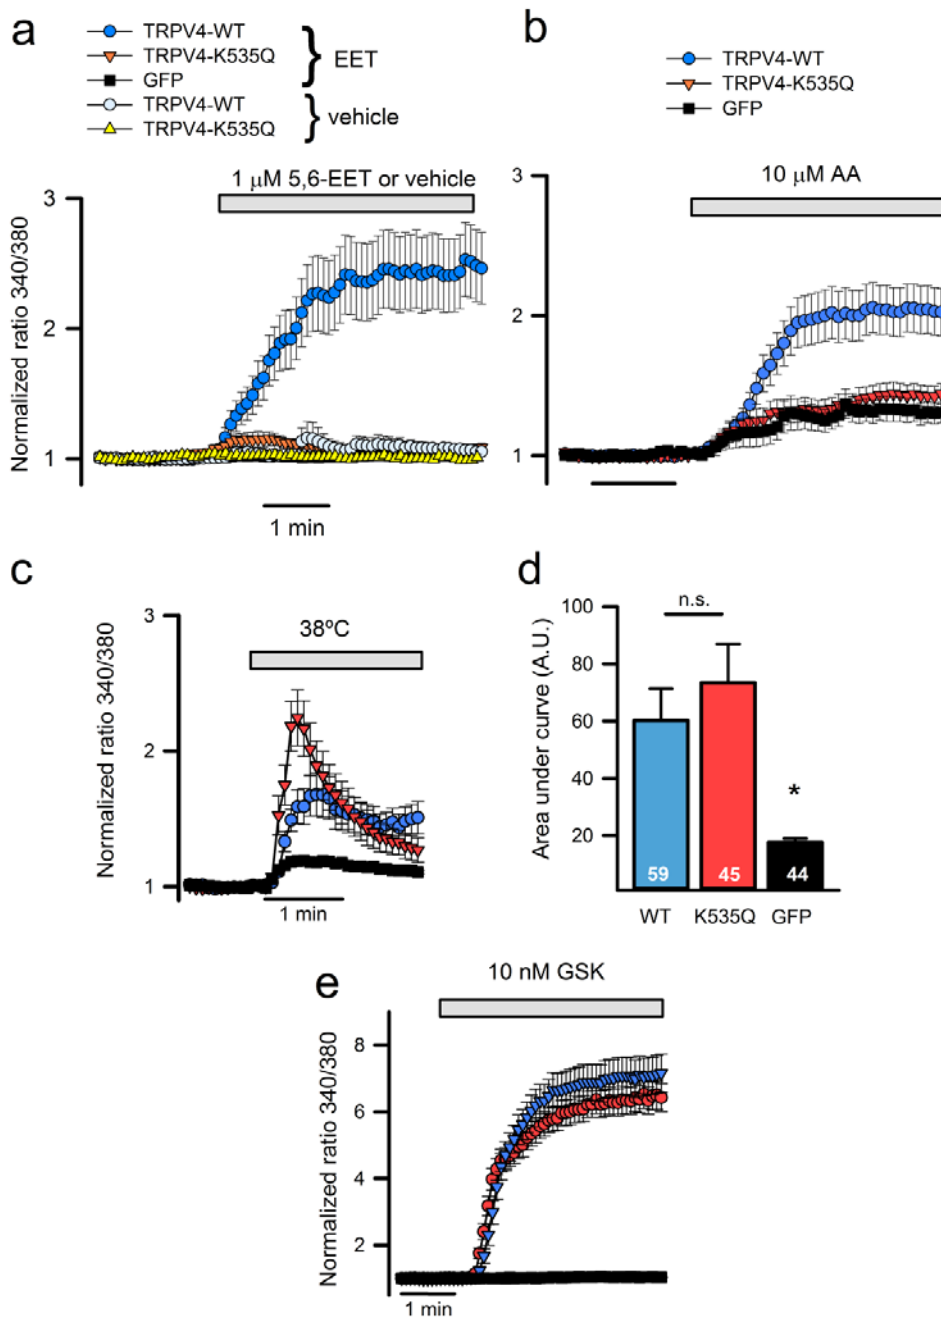

**Figure supplement 8. K535Q substitution abolishes TRPV4 activation by 5',6'-EET and AA, but not by heat or GSK1016790A agonist.** Intracellular  $\text{Ca}^{2+}$  changes (indicated by fura-2 ratios) in HeLa cells transfected with GFP (n=50), TRPV4-WT (n=77) or TRPV4-K535Q (n=74) cDNAs, after perfusion with 1  $\mu$ M 5,6-EET or vehicle (WT, n=51; K535Q, n=20) (**a**), 10  $\mu$ M AA (GFP (n=66), TRPV4-WT (n=90) or TRPV4-K535Q (n=90)) (**b**), warm solution (38 °C) (**c-d**) and 10 nM GSK1016790A (n= 44-59) (**e**). Means  $\pm$  S.E.M. \* $P$ <0.05 or not significant (n.s.) when compared with cells expressing TRPV4 WT channels (Kruskal-Wallis One Way Analysis of Variance followed by Dunn's method of multiple comparisons).

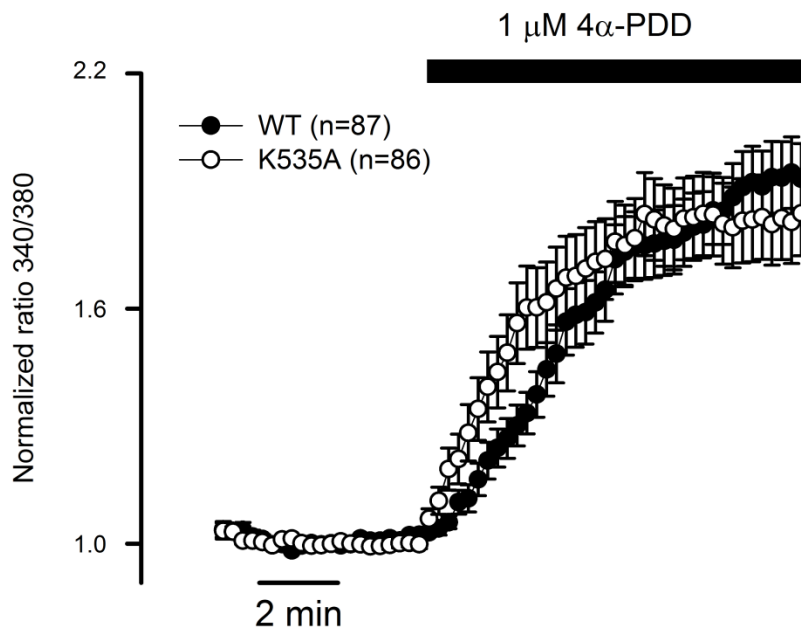

**Figure supplement 9. K535A substitution does not abolish TRPV4 activation by 4α-PDD.** (A), Fura-2 ratios obtained in HeLa cells transfected with TRPV4-WT (n=87) or TRPV4-K535A (n=86) cDNAs, after perfusion with 10 μM 4α-PDD. Traces showing means ± SEM..

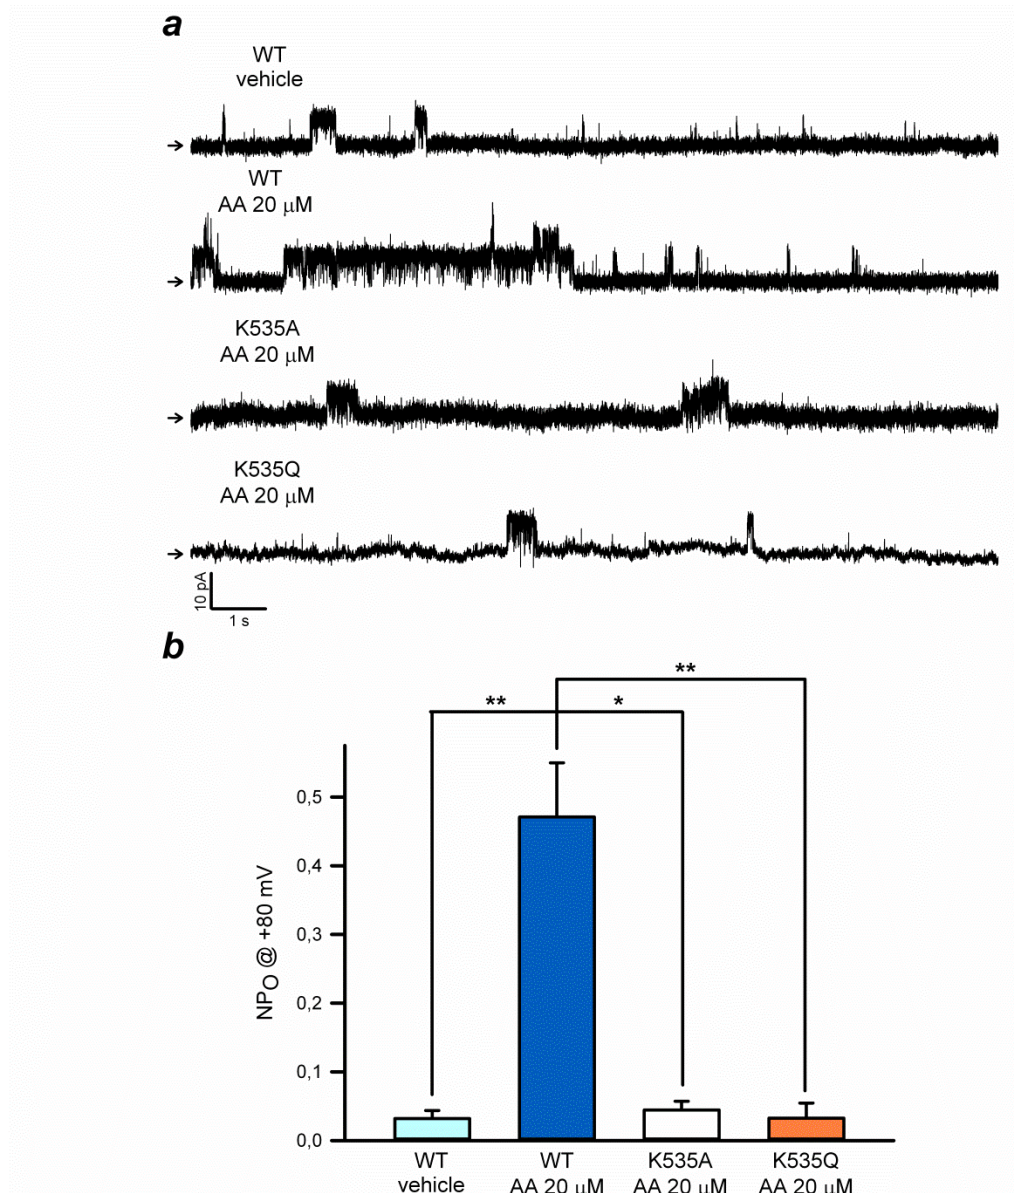

**Figure supplement 10. AA increases open probability of WT but not K535 mutant TRPV4 channels.** (a) Representative 15 s recordings obtained from cell-attached patches clamped at +80mV in HEK293 cells expressing WT, K535A or K535Q TRPV4 mutant channels in the presence of extracellular vehicle (DMSO 1:500) or Arachidonic Acid (AA 20  $\mu$ M), as stated. Arrows indicates the closed state level. (b) Average open probability (NP<sub>0</sub>) (expressed as the mean  $\pm$  SEM) of WT and K535 mutant TRPV4 channels at the experimental conditions indicated above (vehicle, n=6; WT, n=11; K535A, n=7; K535Q, n=6). \*\*P<0.01, \*P<0.05 (Kruskal-Wallis followed by Dunn *post hoc* test).

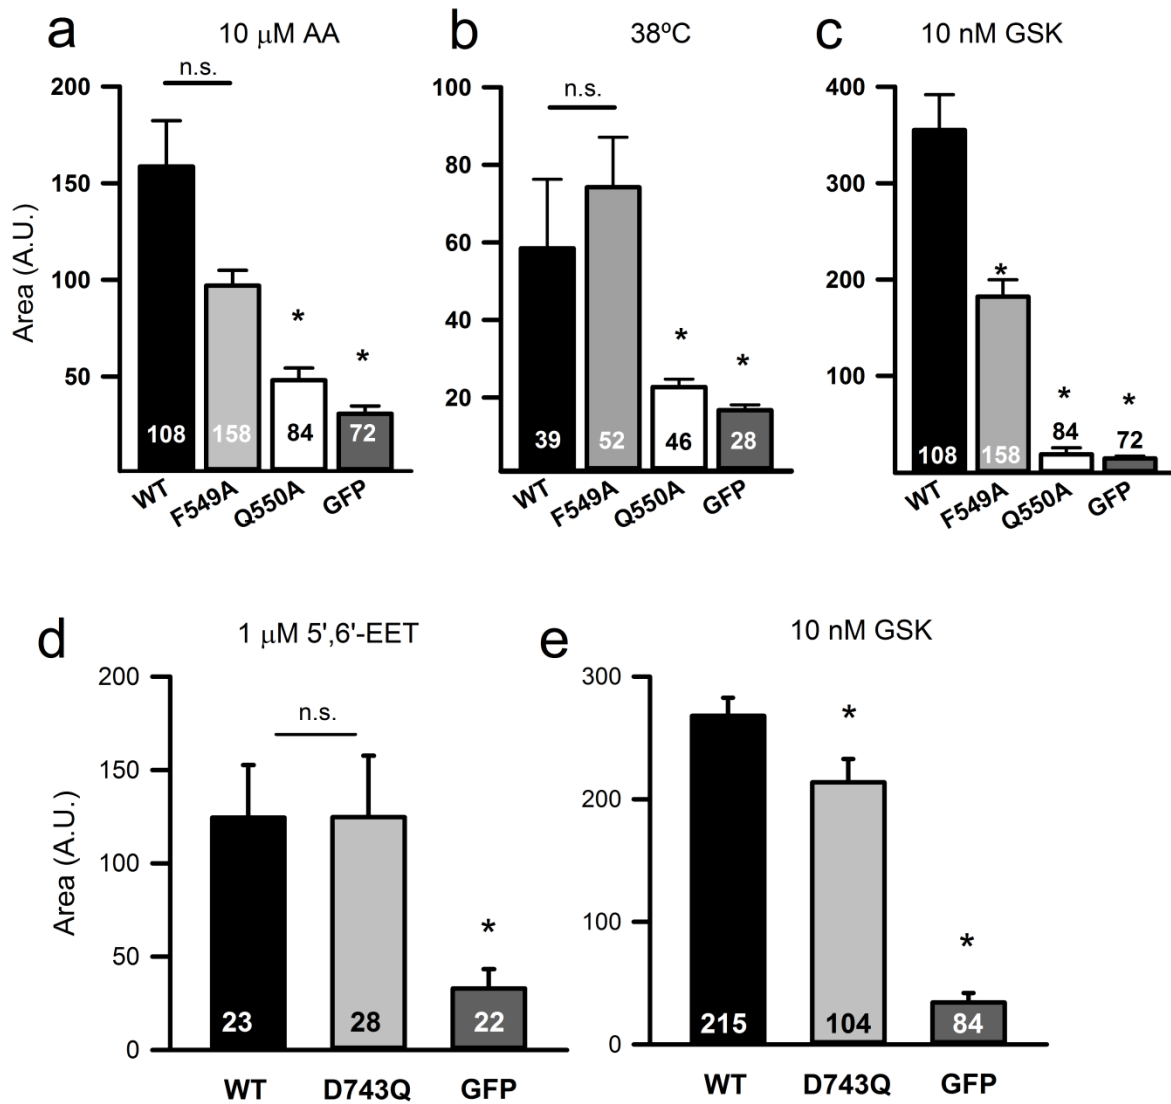

**Figure supplement 11.** Average  $[Ca^{2+}]_i$  increases (area under the curve) obtained from cells expressing TRPV4-WT, TRPV4-F549A, TRPV4-Q550A, TRPV4-D743Q or GFP and exposed to 10  $\mu$ M AA (a), 38°C (b), 10 nM GSK1016790A (c,e) and 1  $\mu$ M 5',6'-EET (d). Numbers inside the bars indicate the number of cells analyzed. \*P < 0.05 or not significant (n.s.) when compared with cells expressing TRPV4 WT channels (one way ANOVA followed by Bonferroni *post hoc* test).

### S2-S3 linker

```
hTRPV4 (Q9HBA0) 530 KDLFMK↓KCPGVNSLFDG↓SFQ 550
hTRPV1 (Q8NER1) 498 QRRPSMKT↓LFVDS 510
hTRPV2 (Q9Y5S1) 456 RRHVFIWISFIDS↓YFE 471
* :: : *:* :
```

### S3

```
hTRPV4 (Q9HBA0) 551 LLYFI↓Y↓SVLVIVSAALYLAGI 571
hTRPV1 (Q8NER1) 511 YSEML↓FFL↓QSLFMLATVVLYF 531
hTRPV2 (Q9Y5S1) 472 ILFLFQALLTVVSQVLCFLAI 492
:*::: ::: ::: .* :
```

### S4

```
hTRPV4 (Q9HBA0) 573 AYLAVMV↓FALVLGWMNAL↓YFT 593
hTRPV1 (Q8NER1) 536 EYVASMV↓FSLALGW↓TNMLYYT 556
hTRPV2 (Q9Y5S1) 494 WYLPLLVSALVLGWL↓NLLYYT 514
* : * : * . * * * * * * * * *
```

### S4-S5 linker

```
hTRPV4 (Q9HBA0) 594 RGLKLTGTYSIMI↓QKILFKDLFR 616
hTRPV1 (Q8NER1) 557 RGFQQMGIYAVMI↓EK 571
hTRPV2 (Q9Y5S1) 515 RGFQHTGIYSVMIQKVILRDLLR 537
* * : * * * * * * * * * * * *
```

### S5

```
hTRPV4 (Q9HBA0) 617 FLLVYLLFMIGYASALVSLLN 637
hTRPV1 (Q8NER1) 572 MILRDL↓CRFMFVYIVFLFGFSTAVVTLI 599
hTRPV2 (Q9Y5S1) 538 FLLIYLVFLFGFAVALVSLSQ 558
* * * * * * * * * * * * * * * *
```

### S6

```
hTRPV4 (Q9HBA0) 691 YPVVFIILLV↓TYIILTFVLLL 711
hTRPV1 (Q8NER1) 659 VFIILL↓LAYVILTYIILLNMLIALMGETV 687
hTRPV2 (Q9Y5S1) 622 VLLLLL↓LAYVLLTYIILLNMLI 642
: : : * * * * * * * * * * * * * * * *
```

**Figure supplement 12. Comparison of human TRPV4, TRPV1 and TRPV2 sequences involved in binding of EET, capsaicin and lipids, respectively.** Sequence alignment of S2-S3 linker, S3, S4, S4-S5 linker and S6 of human TRPV4, TRPV1 and TRPV2 channels. TRPV4 residues predicted to be within a distance of 3.5 Å of EET are shown in purple. TRPV1 residues involved in the binding of capsaicin are displayed in orange <sup>59</sup>. TRPV2

amino acids around the C-terminal region of S4 involved in lipid binding<sup>58</sup> (with some overlap with the binding-pocket for vanilloids at TRPV1) are depicted in blue. Closed arrows indicating those amino acids that are identical and open arrows pointing the conserved or semiconserved residues. “\*” identical residues; “:” conserved substitutions (same amino acid group); “.” semi-conserved substitution (similar shapes).
